# Supplementary material for: Venous Thromboembolism in Cancer Patients Undergoing Chemotherapy: A Systematic Review and Meta-Analysis
Source: Diagnostics (Basel). 2022 Nov 25;12(12):2954. doi: 10.3390/diagnostics12122954 (PMC9777086; doi:10.3390/diagnostics12122954)

### Supplementary Information (SI)

#### Venous thromboembolism in Cancer Patients Undergoing Chemotherapy: A Systematic Review and Meta-Analysis

**Authors:** Ming-Yee Sun and Sonu M. M. Bhaskar\*

\***Correspondence to:** Dr Sonu M. M. Bhaskar, MD PhD FANA

Email: [Sonu.Bhaskar@globalhealthneurolab.org](mailto:Sonu.Bhaskar@globalhealthneurolab.org)

Ph: +61 (02) 873 89179 Fax: +61 (02) 8738 3648

Department of Neurology & Neurophysiology, Neurophysiology Level 1, Clinical Sciences Building, Elizabeth St, Liverpool Hospital, NSW 2170

### List of Contents

1. **Search Strategy** (Keywords/MeSH Terms)
2. **PRISMA Checklist**
3. **Supplemental Tables**
  - a. **Supplemental SI Table S1:** Modified Jadad Analysis for Methodological Quality
  - b. **Supplemental SI Table S2:** Funding bias scores for studies
4. **Supplemental Figures:**
  - a. **Supplemental SI Figure S1:** Forest plot showing the estimated pooled prevalence of VTE in bladder cancer patients
  - b. **Supplemental SI Figure S2:** Forest plot showing the estimated pooled prevalence of VTE in brain cancer patients
  - c. **Supplemental SI Figure S3:** Forest plot showing the estimated pooled prevalence of VTE in breast cancer patients
  - d. **Supplemental SI Figure S4:** Forest plot showing the estimated pooled prevalence of VTE in colorectal cancer patients
  - e. **Supplemental SI Figure S5:** Forest plot showing the estimated pooled prevalence of VTE in gastric cancer patients
  - f. **Supplemental SI Figure S6:** Forest plot showing the estimated pooled prevalence of VTE in lung cancer patients

## Supplementary Information

### *VTE in Cancer Patients undergoing Chemotherapy*

- g. **Supplemental SI Figure S7:** Forest plot showing the estimated pooled prevalence of VTE in lymph cancer patients
- h. **Supplemental SI Figure S8:** Forest plot showing the estimated pooled prevalence of VTE in mesothelial cancer patients
- i. **Supplemental SI Figure S9:** Forest plot showing the estimated pooled prevalence of VTE in ovarian cancer patients

### 1. Search Strategy (Keywords/MeSH Terms)

#### Search Strategy used for PubMed

((("Cancer" OR "Carcinoma" OR "Breast Cancer" OR "lymphoma" OR "Hodgkin's Lymphoma" OR "Non-Hodgkin's lymphoma" OR "Germ cell tumor" OR "Bladder cancer" OR "Lung cancer" OR "Colorectal cancer" OR "Pancreatic cancer" OR "Bone Cancer" OR "Stomach Cancer" OR "Glioblastoma" OR "Brain Cancer" OR "Malignant" OR "meningiomas" OR "schwannomas" OR "pineal gland tumors" OR "pituitary tumors" OR "astrocytomas" OR "Tumor" OR "tumour" OR "Benign Tumor" OR "malignant tumor" OR "Neoplasm" OR "Metastasis" OR "Hamartoma" OR "Carcinoma" OR "Sarcoma" OR "Blastoma" OR "Papilloma" OR "Adenoma" OR "Adenocarcinoma" OR "Paraneoplastic syndrome") OR ("Chemotherapy" OR "Chemotherapeutic" OR "Cisplatin" OR "neoplatin" OR "cismaplat" OR "cis-diamminedichloroplatinum" OR "CDDP" OR "Carboplatin" OR "Paraplatin" OR "Bevacizumab" OR "L-asparaginase" OR "Cyclophosphamide" OR "5-fluorouracil" OR "vinorelbine" OR "CMF" OR "Gemcitabine" OR "FOLFOX" OR "Doxorubicin" OR "Methotrexate" OR "Ifosfamide" OR "Etoposide" OR "MAP" OR "MAPIE" OR "Cyclophosphamide" OR "vincristine" OR "Epirubicin" OR "capecitabine" OR "Bleomycin" OR "prednisolone" OR "Mustine" OR "procarbazine" OR "vinblastine" OR "dacarbazine" OR "Docetaxel" OR "dexamethasone" OR "oxaliplatin")) AND ("Clot" OR "Thrombosis" OR "Venous Thromboembolism" OR "Pulmonary Embolism" OR "Embolism" OR "Deep Vein Thrombosis" OR "DVT" OR "Femoral Vein Thrombosis" OR "Paget-Schroetter Syndrome" OR "PSS" OR "Superior Vena Cava Thrombosis" OR "Jugular Vein Thrombosis" OR "Cerebral Venous Sinus Thrombosis" OR "Cavernous Sinus Thrombosis" OR "Retinal Vein Occlusion" OR "May-Thurner Syndrome" OR "Budd-Chiari Syndrome" OR "thromboembolism" OR "thromboembolic" OR "VTE" OR "PE").

**Filters:** Full text, Clinical Study, Clinical Trial, Clinical Trial Protocol, Phase I, Phase II, Phase III, Phase IV, Comparative Study, Dataset, Evaluation Study, Meta-Analysis, Multicenter Study, Observational Study, Pragmatic Clinical Trial, Randomised Controlled Trial, Review, Systematic Review, Validation Study, Humans, Adult: 18+ years, from 2012-2022

**Results:** 2643

## 2. PRISMA-2020 Checklist

| Section and Topic    | Item # | Checklist item                                                                                                                                                                                            | Location where item is reported |
|----------------------|--------|-----------------------------------------------------------------------------------------------------------------------------------------------------------------------------------------------------------|---------------------------------|
| <b>TITLE</b>         |        |                                                                                                                                                                                                           |                                 |
| Title                | 1      | Identify the report as a systematic review.                                                                                                                                                               | 1, 4                            |
| <b>ABSTRACT</b>      |        |                                                                                                                                                                                                           |                                 |
| Abstract             | 2      | See the PRISMA 2020 for Abstracts checklist.                                                                                                                                                              | 2                               |
| <b>INTRODUCTION</b>  |        |                                                                                                                                                                                                           |                                 |
| Rationale            | 3      | Describe the rationale for the review in the context of existing knowledge.                                                                                                                               | 3                               |
| Objectives           | 4      | Provide an explicit statement of the objective(s) or question(s) the review addresses.                                                                                                                    | 3                               |
| <b>METHODS</b>       |        |                                                                                                                                                                                                           |                                 |
| Eligibility criteria | 5      | Specify the inclusion and exclusion criteria for the review and how studies were grouped for the syntheses.                                                                                               | 4                               |
| Information sources  | 6      | Specify all databases, registers, websites, organisations, reference lists and other sources searched or consulted to identify studies. Specify the date when each source was last searched or consulted. | 4                               |
| Search strategy      | 7      | Present the full search strategies for all databases, registers and websites, including any filters and limits used.                                                                                      | 4, supplementary information    |

## Supplementary Information

*VTE in Cancer Patients undergoing Chemotherapy*

|                               |     |                                                                                                                                                                                                                                                                                                      |                                            |
|-------------------------------|-----|------------------------------------------------------------------------------------------------------------------------------------------------------------------------------------------------------------------------------------------------------------------------------------------------------|--------------------------------------------|
| Selection process             | 8   | Specify the methods used to decide whether a study met the inclusion criteria of the review, including how many reviewers screened each record and each report retrieved, whether they worked independently, and if applicable, details of automation tools used in the process.                     | 4, PRISMA Diagram (Figure 1)               |
| Data collection process       | 9   | Specify the methods used to collect data from reports, including how many reviewers collected data from each report, whether they worked independently, any processes for obtaining or confirming data from study investigators, and if applicable, details of automation tools used in the process. | 4-5                                        |
| Data items                    | 10a | List and define all outcomes for which data were sought. Specify whether all results that were compatible with each outcome domain in each study were sought (e.g. for all measures, time points, analyses), and if not, the methods used to decide which results to collect.                        | 4-6                                        |
|                               | 10b | List and define all other variables for which data were sought (e.g. participant and intervention characteristics, funding sources). Describe any assumptions made about any missing or unclear information.                                                                                         | 4-6, Tables 1-3, Supplementary Information |
| Study risk of bias assessment | 11  | Specify the methods used to assess risk of bias in the included studies, including details of the tool(s) used, how many reviewers assessed each study and                                                                                                                                           | 4, Supplementary Information               |

## Supplementary Information

*VTE in Cancer Patients undergoing Chemotherapy*

|                   |     |                                                                                                                                                                                                                                                             |                                          |
|-------------------|-----|-------------------------------------------------------------------------------------------------------------------------------------------------------------------------------------------------------------------------------------------------------------|------------------------------------------|
|                   |     | whether they worked independently, and if applicable, details of automation tools used in the process.                                                                                                                                                      |                                          |
| Effect measures   | 12  | Specify for each outcome the effect measure(s) (e.g. risk ratio, mean difference) used in the synthesis or presentation of results.                                                                                                                         | 5, Table 4 and Supplementary Information |
| Synthesis methods | 13a | Describe the processes used to decide which studies were eligible for each synthesis (e.g. tabulating the study intervention characteristics and comparing against the planned groups for each synthesis (item #5)).                                        | 4-5, Tables 1-2                          |
|                   | 13b | Describe any methods required to prepare the data for presentation or synthesis, such as handling of missing summary statistics, or data conversions.                                                                                                       | 4-5                                      |
|                   | 13c | Describe any methods used to tabulate or visually display results of individual studies and syntheses.                                                                                                                                                      | 4-5                                      |
|                   | 13d | Describe any methods used to synthesize results and provide a rationale for the choice(s). If meta-analysis was performed, describe the model(s), method(s) to identify the presence and extent of statistical heterogeneity, and software package(s) used. | 5                                        |
|                   | 13e | Describe any methods used to explore possible causes of heterogeneity among                                                                                                                                                                                 | 5                                        |

## Supplementary Information

*VTE in Cancer Patients undergoing Chemotherapy*

|                               |     |                                                                                                                                                                                              |                                        |
|-------------------------------|-----|----------------------------------------------------------------------------------------------------------------------------------------------------------------------------------------------|----------------------------------------|
|                               |     | study results (e.g. subgroup analysis, meta-regression).                                                                                                                                     |                                        |
|                               | 13f | Describe any sensitivity analyses conducted to assess robustness of the synthesized results.                                                                                                 | NA                                     |
| Reporting bias assessment     | 14  | Describe any methods used to assess risk of bias due to missing results in a synthesis (arising from reporting biases).                                                                      | Supplementary Information, SI Table S1 |
| Certainty assessment          | 15  | Describe any methods used to assess certainty (or confidence) in the body of evidence for an outcome.                                                                                        | Table 4                                |
| <b>RESULTS</b>                |     |                                                                                                                                                                                              |                                        |
| Study selection               | 16a | Describe the results of the search and selection process, from the number of records identified in the search to the number of studies included in the review, ideally using a flow diagram. | 6-7, PRISMA Diagram (Figure 1)         |
|                               | 16b | Cite studies that might appear to meet the inclusion criteria, but which were excluded, and explain why they were excluded.                                                                  | -                                      |
| Study characteristics         | 17  | Cite each included study and present its characteristics.                                                                                                                                    | 8, 31                                  |
| Risk of bias in studies       | 18  | Present assessments of risk of bias for each included study.                                                                                                                                 | Supplementary Information              |
| Results of individual studies | 19  | For all outcomes, present, for each study: (a) summary statistics for each group (where appropriate) and (b) an effect estimate and its precision (e.g.                                      | 8-14, Supplementary information        |

## Supplementary Information

*VTE in Cancer Patients undergoing Chemotherapy*

|                       |     |                                                                                                                                                                                                                                                                                      |                                 |
|-----------------------|-----|--------------------------------------------------------------------------------------------------------------------------------------------------------------------------------------------------------------------------------------------------------------------------------------|---------------------------------|
|                       |     | confidence/credible interval), ideally using structured tables or plots.                                                                                                                                                                                                             |                                 |
| Results of syntheses  | 20a | For each synthesis, briefly summarise the characteristics and risk of bias among contributing studies.                                                                                                                                                                               | 8-14, supplementary information |
|                       | 20b | Present results of all statistical syntheses conducted. If meta-analysis was done, present for each the summary estimate and its precision (e.g. confidence/credible interval) and measures of statistical heterogeneity. If comparing groups, describe the direction of the effect. | 8-14, Table 4                   |
|                       | 20c | Present results of all investigations of possible causes of heterogeneity among study results.                                                                                                                                                                                       | NA                              |
|                       | 20d | Present results of all sensitivity analyses conducted to assess the robustness of the synthesized results.                                                                                                                                                                           | NA                              |
| Reporting biases      | 21  | Present assessments of risk of bias due to missing results (arising from reporting biases) for each synthesis assessed.                                                                                                                                                              | -                               |
| Certainty of evidence | 22  | Present assessments of certainty (or confidence) in the body of evidence for each outcome assessed.                                                                                                                                                                                  | 8-14                            |
| <b>DISCUSSION</b>     |     |                                                                                                                                                                                                                                                                                      |                                 |
| Discussion            | 23a | Provide a general interpretation of the results in the context of other evidence.                                                                                                                                                                                                    | 16-18                           |

## Supplementary Information

*VTE in Cancer Patients undergoing Chemotherapy*

|                                                |     |                                                                                                                                                                                                                                            |                                  |
|------------------------------------------------|-----|--------------------------------------------------------------------------------------------------------------------------------------------------------------------------------------------------------------------------------------------|----------------------------------|
|                                                | 23b | Discuss any limitations of the evidence included in the review.                                                                                                                                                                            | 30-31                            |
|                                                | 23c | Discuss any limitations of the review processes used.                                                                                                                                                                                      | 30-31                            |
|                                                | 23d | Discuss implications of the results for practice, policy, and future research.                                                                                                                                                             | 16-18, 30-32                     |
| <b>OTHER INFORMATION</b>                       |     |                                                                                                                                                                                                                                            |                                  |
| Registration and protocol                      | 24a | Provide registration information for the review, including register name and registration number, or state that the review was not registered.                                                                                             | NA                               |
|                                                | 24b | Indicate where the review protocol can be accessed, or state that a protocol was not prepared.                                                                                                                                             | NA                               |
|                                                | 24c | Describe and explain any amendments to information provided at registration or in the protocol.                                                                                                                                            | NA                               |
| Support                                        | 25  | Describe sources of financial or non-financial support for the review, and the role of the funders or sponsors in the review.                                                                                                              | 32-33                            |
| Competing interests                            | 26  | Declare any competing interests of review authors.                                                                                                                                                                                         | 32-33                            |
| Availability of data, code and other materials | 27  | Report which of the following are publicly available and where they can be found: template data collection forms; data extracted from included studies; data used for all analyses; analytic code; any other materials used in the review. | 32-33, Supplementary Information |

From: [1] Page MJ, McKenzie JE, Bossuyt PM, Boutron I, Hoffmann TC, Mulrow CD, et al. The PRISMA 2020 statement: an updated guideline for reporting systematic reviews. BMJ 2021;372:n71. doi: 10.1136/bmj.n71

### 3. Supplemental Tables

#### a. Table S1. Modified Jadad Analysis for Methodological Quality.

| StudyID | Authors                | Criteria 1 | Criteria 2 | Criteria 3 | Criteria 4 | Criteria 5 | Criteria 6 | Criteria 7 | Criteria 8 | TOTAL |
|---------|------------------------|------------|------------|------------|------------|------------|------------|------------|------------|-------|
| 1       | Affronti et al., 2018  | 0          | 0          | 0          | 0          | 1          | 1          | 1          | 1          | 4     |
| 2       | Alexander et al., 2012 | 0          | 0          | 0          | 0          | 1          | 1          | 1          | 1          | 4     |
| 3       | Alvarez et al., 2014   | 0          | 0          | 0          | 0          | 1          | 1          | 1          | 1          | 4     |
| 4       | Assenat et al., 2021a  | 0          | 0          | 0          | 0          | 1          | 1          | 1          | 1          | 4     |
| 5       | Assenat et al., 2021b  | 0          | 0          | 0          | 0          | 1          | 1          | 1          | 1          | 4     |
| 6       | Bai et al., 2015       | 0          | 0          | 0          | 0          | 1          | 1          | 1          | 1          | 4     |
| 7       | Balar et al., 2013     | 0          | 0          | 0          | 0          | 1          | 1          | 1          | 1          | 4     |
| 8       | Basso et al., 2013     | 0          | 0          | 0          | 0          | 1          | 1          | 1          | 1          | 4     |
| 9       | Bear et al., 2015      | 1          | 1          | 1          | 1          | 1          | 1          | 1          | 1          | 8     |
| 10      | Buxo et al., 2018      | 0          | 0          | 0          | 0          | 1          | 1          | 1          | 1          | 4     |
| 11      | Campbell et al., 2012  | 0          | 0          | 0          | 0          | 1          | 1          | 1          | 1          | 4     |
| 12      | Chekerov et al., 2018  | 1          | 1          | 1          | 1          | 1          | 1          | 1          | 1          | 8     |
| 13      | Chen et al., 2015      | 0          | 0          | 0          | 0          | 1          | 1          | 1          | 1          | 4     |
| 14      | Chibaudel et al., 2019 | 0          | 0          | 0          | 0          | 1          | 1          | 1          | 1          | 4     |
| 15      | Ciombor et al., 2014   | 0          | 0          | 0          | 0          | 1          | 1          | 1          | 1          | 4     |
| 16      | Cremolini et al., 2020 | 1          | 1          | 0          | 0          | 1          | 1          | 1          | 1          | 6     |

**Supplementary Information**  
*VTE in Cancer Patients undergoing Chemotherapy*

|    |                               |   |   |   |   |   |   |   |   |          |
|----|-------------------------------|---|---|---|---|---|---|---|---|----------|
| 17 | de Vos et al., 2014           | 0 | 0 | 0 | 0 | 1 | 1 | 1 | 1 | <b>4</b> |
| 18 | DeCensi et al., 2019          | 1 | 1 | 1 | 1 | 1 | 1 | 1 | 1 | <b>8</b> |
| 19 | Deschenes-Simard et al., 2021 | 0 | 0 | 0 | 0 | 0 | 0 | 1 | 1 | <b>2</b> |
| 20 | Donskov et al., 2018          | 1 | 1 | 0 | 0 | 1 | 1 | 1 | 1 | <b>6</b> |
| 21 | Dowell et al., 2012           | 0 | 0 | 0 | 0 | 1 | 1 | 1 | 1 | <b>4</b> |
| 22 | Dummer et al., 2012           | 0 | 0 | 0 | 0 | 1 | 1 | 1 | 1 | <b>4</b> |
| 23 | Duvic et al., 2015            | 0 | 0 | 0 | 0 | 1 | 1 | 1 | 1 | <b>4</b> |
| 24 | Fehr et al., 2020             | 1 | 1 | 0 | 0 | 1 | 1 | 1 | 1 | <b>6</b> |
| 25 | Feliu et al., 2014            | 0 | 0 | 0 | 0 | 1 | 1 | 1 | 1 | <b>4</b> |
| 26 | Fleming et al., 2014          | 1 | 1 | 0 | 0 | 1 | 1 | 1 | 1 | <b>6</b> |
| 27 | Folprecht et al., 2016        | 0 | 0 | 0 | 0 | 1 | 1 | 1 | 1 | <b>4</b> |
| 28 | Frizziero et al., 2019        | 0 | 0 | 0 | 0 | 1 | 1 | 1 | 1 | <b>4</b> |
| 29 | Fuchs et al., 2019            | 1 | 1 | 1 | 1 | 1 | 1 | 1 | 1 | <b>8</b> |
| 30 | Ghiaseddin et al., 2018       | 0 | 0 | 0 | 0 | 1 | 1 | 1 | 1 | <b>4</b> |
| 31 | Ghiringelli et al., 2012      | 0 | 0 | 0 | 0 | 1 | 1 | 1 | 1 | <b>4</b> |
| 32 | Goss et al., 2016             | 0 | 0 | 0 | 0 | 1 | 1 | 1 | 1 | <b>4</b> |
| 33 | Gronberg et al., 2012         | 1 | 1 | 1 | 1 | 1 | 1 | 1 | 1 | <b>8</b> |
| 34 | Guigay et al., 2015           | 0 | 0 | 0 | 0 | 1 | 1 | 1 | 1 | <b>4</b> |
| 35 | He et al., 2020               | 0 | 0 | 0 | 0 | 1 | 1 | 1 | 1 | <b>4</b> |
| 36 | Hirsch et al., 2017           | 1 | 1 | 0 | 0 | 1 | 1 | 1 | 1 | <b>6</b> |
| 37 | Honecker et al., 2013         | 0 | 0 | 0 | 0 | 1 | 1 | 1 | 1 | <b>4</b> |

## Supplementary Information

### *VTE in Cancer Patients undergoing Chemotherapy*

|    |                              |   |   |   |   |   |   |   |   |          |
|----|------------------------------|---|---|---|---|---|---|---|---|----------|
| 38 | Hu et al., 2015              | 0 | 0 | 0 | 0 | 1 | 1 | 1 | 1 | <b>4</b> |
| 39 | Idelevich et al., 2012       | 0 | 0 | 0 | 0 | 1 | 1 | 1 | 1 | <b>4</b> |
| 40 | Ikemura et al., 2015         | 0 | 0 | 0 | 0 | 1 | 1 | 1 | 1 | <b>4</b> |
| 41 | Ishida et al., 2015          | 0 | 0 | 0 | 0 | 1 | 1 | 1 | 1 | <b>4</b> |
| 42 | Kakkos et al., 2020          | 0 | 0 | 0 | 0 | 1 | 1 | 1 | 1 | <b>4</b> |
| 43 | Karavasilis et al., 2014     | 1 | 1 | 0 | 0 | 1 | 1 | 1 | 1 | <b>6</b> |
| 44 | Kim et al., 2018             | 1 | 1 | 0 | 0 | 1 | 1 | 1 | 1 | <b>6</b> |
| 45 | Kitayama et al., 2017        | 0 | 0 | 0 | 0 | 1 | 1 | 1 | 1 | <b>4</b> |
| 46 | Konecny et al., 2015         | 0 | 0 | 0 | 0 | 1 | 1 | 1 | 1 | <b>4</b> |
| 47 | Kottschade et al., 2013      | 1 | 1 | 0 | 0 | 1 | 1 | 1 | 1 | <b>6</b> |
| 48 | Lang et al., 2012            | 1 | 1 | 0 | 0 | 1 | 1 | 1 | 1 | <b>6</b> |
| 49 | Lara et al., 2016            | 1 | 1 | 0 | 0 | 1 | 1 | 1 | 1 | <b>6</b> |
| 50 | Larsen et al., 2015          | 0 | 0 | 0 | 0 | 1 | 1 | 1 | 1 | <b>4</b> |
| 51 | Lee et al., 2020             | 0 | 0 | 0 | 0 | 1 | 1 | 1 | 1 | <b>4</b> |
| 52 | Maio et al., 2017            | 1 | 1 | 1 | 1 | 1 | 1 | 1 | 1 | <b>8</b> |
| 53 | Makielski et al., 2015       | 0 | 0 | 0 | 0 | 1 | 1 | 1 | 1 | <b>4</b> |
| 54 | Matsumoto et al., 2015       | 0 | 0 | 0 | 0 | 1 | 1 | 1 | 1 | <b>4</b> |
| 55 | Michelsen and Sorensen, 2015 | 0 | 0 | 0 | 0 | 1 | 1 | 1 | 1 | <b>4</b> |
| 56 | Mountzios et al., 2012       | 0 | 0 | 0 | 0 | 1 | 1 | 1 | 1 | <b>4</b> |
| 57 | Nagane et al., 2012          | 0 | 0 | 0 | 0 | 1 | 1 | 1 | 1 | <b>4</b> |
| 58 | Okines et al., 2013          | 1 | 1 | 0 | 0 | 1 | 1 | 1 | 1 | <b>6</b> |

## Supplementary Information

### *VTE in Cancer Patients undergoing Chemotherapy*

|    |                           |   |   |   |   |   |   |   |   |          |
|----|---------------------------|---|---|---|---|---|---|---|---|----------|
| 59 | Ottosson et al., 2020     | 0 | 0 | 0 | 0 | 1 | 1 | 1 | 1 | <b>4</b> |
| 60 | Peeters et al., 2013      | 1 | 1 | 1 | 1 | 1 | 1 | 1 | 1 | <b>8</b> |
| 61 | Pitz et al., 2015         | 0 | 0 | 0 | 0 | 1 | 1 | 1 | 1 | <b>4</b> |
| 62 | Powell et al., 2013       | 0 | 0 | 0 | 0 | 1 | 1 | 1 | 1 | <b>4</b> |
| 63 | Ramos et al., 2017        | 0 | 0 | 0 | 0 | 1 | 1 | 1 | 1 | <b>4</b> |
| 64 | Reck et al., 2014         | 1 | 1 | 1 | 1 | 1 | 1 | 1 | 1 | <b>8</b> |
| 65 | Reyes-Botero et al., 2018 | 0 | 0 | 0 | 0 | 1 | 1 | 1 | 1 | <b>4</b> |
| 66 | Rivera et al., 2015       | 0 | 0 | 0 | 0 | 1 | 1 | 1 | 1 | <b>4</b> |
| 67 | Saad et al., 2021         | 1 | 1 | 1 | 1 | 1 | 1 | 1 | 1 | <b>8</b> |
| 68 | Salinaro et al., 2020     | 0 | 0 | 0 | 0 | 1 | 1 | 1 | 1 | <b>4</b> |
| 69 | Salles et al., 2020       | 0 | 0 | 0 | 0 | 1 | 1 | 1 | 1 | <b>4</b> |
| 70 | Seidel et al., 2012       | 0 | 0 | 0 | 0 | 0 | 1 | 1 | 1 | <b>3</b> |
| 71 | Slagter et al., 2020      | 0 | 0 | 0 | 0 | 1 | 1 | 1 | 1 | <b>4</b> |
| 72 | Sonpavde et al., 2011     | 1 | 1 | 1 | 1 | 1 | 1 | 1 | 1 | <b>8</b> |
| 73 | Stevenson et al., 2012    | 0 | 0 | 0 | 0 | 1 | 1 | 1 | 1 | <b>4</b> |
| 74 | Tahover et al., 2015      | 0 | 0 | 0 | 0 | 1 | 1 | 1 | 1 | <b>4</b> |
| 75 | Tan et al., 2021          | 1 | 1 | 0 | 0 | 1 | 1 | 1 | 1 | <b>6</b> |
| 76 | Tryfonidis et al., 2013   | 0 | 0 | 0 | 0 | 1 | 1 | 1 | 1 | <b>4</b> |
| 77 | Tunio et al., 2012        | 0 | 0 | 0 | 0 | 1 | 1 | 1 | 1 | <b>4</b> |
| 78 | Uetake et al., 2015       | 0 | 0 | 0 | 0 | 1 | 1 | 1 | 1 | <b>4</b> |
| 79 | Usmani et al., 2019       | 1 | 1 | 0 | 0 | 1 | 1 | 1 | 1 | <b>6</b> |

## Supplementary Information

*VTE in Cancer Patients undergoing Chemotherapy*

|    |                            |   |   |   |   |   |   |   |   |   |
|----|----------------------------|---|---|---|---|---|---|---|---|---|
| 80 | Vaishampayan et al., 2014  | 0 | 0 | 0 | 0 | 1 | 1 | 1 | 1 | 4 |
| 81 | Valle et al., 2021         | 1 | 1 | 1 | 1 | 1 | 1 | 1 | 1 | 8 |
| 82 | Wolff et al., 2012         | 1 | 1 | 1 | 1 | 1 | 1 | 1 | 1 | 8 |
| 83 | Yamazaki et al., 2016      | 1 | 1 | 0 | 0 | 1 | 1 | 1 | 1 | 6 |
| 84 | Yardley et al., 2012       | 0 | 0 | 0 | 0 | 1 | 1 | 1 | 1 | 4 |
| 85 | Zalcman et al., 2016       | 1 | 1 | 0 | 0 | 1 | 1 | 1 | 1 | 6 |
| 86 | Baggstrom et al., 2018     | 1 | 1 | 1 | 1 | 1 | 1 | 1 | 1 | 8 |
| 87 | Chavan et al., 2017        | 0 | 0 | 0 | 0 | 1 | 1 | 1 | 1 | 4 |
| 88 | Duivenvoorden et al., 2016 | 0 | 0 | 0 | 0 | 1 | 1 | 1 | 1 | 4 |
| 89 | Gay et al., 2010           | 0 | 0 | 0 | 0 | 1 | 1 | 1 | 1 | 4 |
| 90 | Hong et al., 2012          | 0 | 0 | 0 | 0 | 1 | 1 | 1 | 1 | 4 |
| 91 | Kang et al., 2012          | 0 | 0 | 0 | 0 | 1 | 1 | 1 | 1 | 4 |
| 92 | Li et al., 2017            | 0 | 0 | 0 | 0 | 1 | 1 | 1 | 1 | 4 |
| 93 | Martella et al., 2022      | 0 | 0 | 0 | 0 | 1 | 1 | 1 | 1 | 4 |
| 94 | Matikas et al., 2016       | 0 | 0 | 0 | 0 | 1 | 1 | 1 | 1 | 4 |
| 95 | Monk et al., 2018          | 0 | 0 | 0 | 0 | 1 | 1 | 1 | 1 | 4 |
| 96 | Slavicek et al., 2014      | 0 | 0 | 0 | 0 | 1 | 1 | 1 | 1 | 4 |
| 97 | Tachihara et al., 2020     | 0 | 0 | 0 | 0 | 1 | 1 | 1 | 1 | 4 |
| 98 | Tewari et al., 2018        | 1 | 1 | 0 | 0 | 1 | 1 | 1 | 1 | 6 |
| 99 | Yildiz et al., 2012        | 0 | 0 | 0 | 0 | 1 | 1 | 1 | 1 | 4 |

## Supplementary Information

### *VTE in Cancer Patients undergoing Chemotherapy*

|     |                     |   |   |   |   |   |   |   |   |   |
|-----|---------------------|---|---|---|---|---|---|---|---|---|
| 100 | Lee et al., 2013    | 0 | 0 | 0 | 0 | 1 | 1 | 1 | 1 | 4 |
| 101 | Reynes et al., 2016 | 0 | 0 | 0 | 0 | 1 | 1 | 1 | 1 | 4 |
| 102 | Pinto et al., 2021  | 1 | 1 | 1 | 1 | 1 | 1 | 1 | 1 | 6 |

**Criteria 1: Was the study randomised? (0 = no, 1 = yes)**

**Criteria 2: Was the method of randomisation appropriate (0 = no, 1 = yes)**

**Criteria 3: Was the study described as being blinded? (0 = no, 1 = yes)**

**Criteria 4: Was the method of blinding appropriate? (0 = no, 1 = yes)**

**Criteria 5: Was there a description of withdrawals and dropouts? (0 = no, 1 = yes)**

**Criteria 6: Was there a clear description of the inclusion/exclusion criteria? (0 = no, 1 = yes)**

**Criteria 7: Was the method used to assess adverse events described? (0 = no, 1 = yes)**

**Criteria 8: Was the method of statistical analysis described? (0 = no, 1 = yes)**

### **b. Table S2. Publication Bias Scores for Studies.**

| StudyID | Authors                | Publication Bias | Funding                                                                                                         |
|---------|------------------------|------------------|-----------------------------------------------------------------------------------------------------------------|
| 1       | Affronti et al., 2018  | 2                | Amgen supported investigator-initiated trial, sponsored by the principal investigators of Affronti and Peters   |
| 2       | Alexander et al., 2012 | 1                | Grant from National Cancer Institute, one author consulted and had stock options in several biopharma companies |
| 3       | Alvarez et al., 2014   | 0                | National Cancer Institute grants                                                                                |
| 4       | Assenat et al., 2021a  | 2                | Supported by Celgene                                                                                            |
| 5       | Assenat et al., 2021b  | 2                | Work supported by CELGENE SAS                                                                                   |

## Supplementary Information

### *VTE in Cancer Patients undergoing Chemotherapy*

|    |                               |     |                                                                                                                                                      |
|----|-------------------------------|-----|------------------------------------------------------------------------------------------------------------------------------------------------------|
| 6  | Bai et al., 2015              | 0   | Funded by the Dutch Cancer Foundation, Swedish Cancer Society, Spanish Ministry of Economy and Competitiveness and Spanish Clinical Research Network |
| 7  | Balar et al., 2013            | N/A | Undeclared                                                                                                                                           |
| 8  | Basso et al., 2013            | 2   | Austrian Fulvestrant Registry is supported by a grant from AstraZeneca Pharmaceuticals                                                               |
| 9  | Bear et al., 2015             | 2   | Grant from Pfizer                                                                                                                                    |
| 10 | Buxo et al., 2018             | 0   | Supported by grant from NIH (America)                                                                                                                |
| 11 | Campbell et al., 2012         | 0   | No conflict of interest                                                                                                                              |
| 12 | Chekerov et al., 2018         | 0   | Funded by research grants from the National Natural Science Foundation of China                                                                      |
| 13 | Chen et al., 2015             | 0   | No conflict of interest                                                                                                                              |
| 14 | Chibaudel et al., 2019        | 2   | Clinical trial supported by Merck                                                                                                                    |
| 15 | Ciombor et al., 2014          | 1   | Personal fees for various authors from Roche Pharma, Amgen, Sanofi, Bayer, Celgene, Lilly, etc                                                       |
| 16 | Cremolini et al., 2020        | 0   | No conflict of interest                                                                                                                              |
| 17 | de Vos et al., 2014           | 1   | Grant from National Cancer Institute, partly from OSI Pharmaceuticals and sanofi-aventis                                                             |
| 18 | DeCensi et al., 2019          | 2   | Study supported by Seattle Genetics, all authors received research funding and some have equity ownership in the company                             |
| 19 | Deschenes-Simard et al., 2021 | 0   | No conflict of interest                                                                                                                              |
| 20 | Donskov et al., 2018          | 2   | Funded by Celgene                                                                                                                                    |
| 21 | Dowell et al., 2012           | 2   | Funded by Roche and Novartis, BEV provided by Roche                                                                                                  |
| 22 | Dummer et al., 2012           | 2   | Funded by Genentech, with research grants and compensation to multiple authors from Genentech and Lilly                                              |
| 23 | Duvic et al., 2015            | 2   | Eli Lilly Pharmaceuticals                                                                                                                            |
| 24 | Fehr et al., 2020             | 2   | Funding from Pfizer, Sanofi-Aventis, NIH                                                                                                             |
| 25 | Feliu et al., 2014            | 2   | Supported by Hoffmann-La Roche                                                                                                                       |

## Supplementary Information

*VTE in Cancer Patients undergoing Chemotherapy*

|    |                          |     |                                                                                                                                                                   |
|----|--------------------------|-----|-------------------------------------------------------------------------------------------------------------------------------------------------------------------|
| 26 | Fleming et al., 2014     | 2   | Supported by Roche Farma, Spain                                                                                                                                   |
| 27 | Folprecht et al., 2016   | 0   | Grants from National Cancer Institute                                                                                                                             |
| 28 | Frizziero et al., 2019   | N/A | Undeclared                                                                                                                                                        |
| 29 | Fuchs et al., 2019       | 0   | Partially funded by American Society of Clinical Oncology                                                                                                         |
| 30 | Ghiaseddin et al., 2018  | 2   | Funded by Bristol-Myers Suibb and Howard I. Scher                                                                                                                 |
| 31 | Ghiringelli et al., 2012 | 1   | Various authors have research funding and consulting relationship with pharma companies                                                                           |
| 32 | Goss et al., 2016        | 0   | Supported by National Institute of Health Grants and other Research Funds                                                                                         |
| 33 | Gronberg et al., 2012    | 0   | Supported by NIH grants                                                                                                                                           |
| 34 | Guigay et al., 2015      | 0   | Funded by Norweigan Cancer Society, Nordic Cancer Union, etc                                                                                                      |
| 35 | He et al., 2020          | 1   | Supported by Copenhagen University Hospital and Danish Natinal Board of Health, an author has received research grants and speaking fees from Roche A/S and Merck |
| 36 | Hirsch et al.m 2017      | 2   | Roche Pharma Schweiz                                                                                                                                              |
| 37 | Honecker et al., 2013    | N/A | Undeclared                                                                                                                                                        |
| 38 | Hu et al., 2015          | 2   | Sanofi-aventis                                                                                                                                                    |
| 39 | Idelevich et al., 2012   | 2   | Grants from Schering-Plough Corporation and Celgene Corporation                                                                                                   |
| 40 | Ikemura et al., 2015     | N/A | Undeclared                                                                                                                                                        |
| 41 | Ishida et al., 2015      | N/A | Undeclared                                                                                                                                                        |
| 42 | Kakkos et al., 2020      | 2   | Supported by Public Health Service grants and Eli Lilly Pharmaceutical Company                                                                                    |
| 43 | Karavasilis et al., 2014 | 0   | No conflict of interest                                                                                                                                           |
| 44 | Kim et al., 2018         | 2   | Kyowa Kirin                                                                                                                                                       |
| 45 | Kitayama et al., 2017    | 2   | Research dunging from Hedy Lee Kindler, Eli Lilly, Genentech, Roche                                                                                               |
| 46 | Konecny et al., 2015     | 2   | Financial support from Celgene International                                                                                                                      |

## Supplementary Information

*VTE in Cancer Patients undergoing Chemotherapy*

|    |                              |   |                                                                                                                                                |
|----|------------------------------|---|------------------------------------------------------------------------------------------------------------------------------------------------|
| 47 | Kottschade et al., 2013      | 2 | Funded by Novartis Pharmaceuticals                                                                                                             |
| 48 | Lang et al., 2012            | 0 | Funding from the National Cancer Institute Intramural Research Program                                                                         |
| 49 | Lara et al., 2016            | 2 | Work supported by F.Hoffmann-La Roche                                                                                                          |
| 50 | Larsen et al., 2015          | 1 | Supported by National Cancer Institute, in part by Biodesix and Genentech                                                                      |
| 51 | Lee et al., 2020             | 0 | Grants from the National Institute of Health                                                                                                   |
| 52 | Maio et al., 2017            | 2 | Supported by AstraZeneca                                                                                                                       |
| 53 | Makielski et al., 2015       | 2 | Funded by AstraZeneca with multiple authors having funding from other pharmaceutical companies such as Eli Lilly, Novartis, Roche Laboratories |
| 54 | Matsumoto et al., 2015       | 0 | Supported by National Cancer Research and Development Funds                                                                                    |
| 55 | Michelsen and Sorensen, 2015 | 2 | Eli Lilly & Co                                                                                                                                 |
| 56 | Mountzios et al., 2012       | 1 | National Cancer Institute, but some authors are honoraria/stock ownership/research funding from Genentech                                      |
| 57 | Nagane et al., 2012          | 2 | Aventis and Roche Pharmaceuticals                                                                                                              |
| 58 | Okines et al., 2013          | 0 | Funded by Imperial Cancer Research Fund                                                                                                        |
| 59 | Ottosson et al., 2020        | 0 | Ministry of Health, Labour and Welfare of Japan grants                                                                                         |
| 60 | Peeters et al., 2013         | 2 | Research funds from Eli Lilly and Co                                                                                                           |
| 61 | Pitz et al., 2015            | 1 | Capecitabine given by Roche                                                                                                                    |
| 62 | Powell et al., 2013          | 2 | Partially funded by Glaxo SmithKline and Genentech Inc                                                                                         |
| 63 | Ramos et al., 2017           | 2 | Partially funded by Glaxo SmithKline and Genentech Inc                                                                                         |
| 64 | Reck et al., 2014            | 2 | Grant from Genentech                                                                                                                           |
| 65 | Reyes-Botero et al., 2018    | 2 | Funding from Boehringer Ingelheim                                                                                                              |
| 66 | Rivera et al., 2015          | 1 | Research support from Celgene and honoraria                                                                                                    |

**Supplementary Information**  
*VTE in Cancer Patients undergoing Chemotherapy*

|    |                           |     |                                                                                                                                                       |
|----|---------------------------|-----|-------------------------------------------------------------------------------------------------------------------------------------------------------|
| 67 | Saad et al., 2021         | 0   | Grants from National Cancer Institute                                                                                                                 |
| 68 | Salinaro et al., 2020     | 2   | Funded by Janssen Global Services, multiple authors receive benefits from pharma                                                                      |
| 69 | Salles et al., 2020       | 0   | No conflict of interest                                                                                                                               |
| 70 | Seidel et al., 2012       | 2   | Supported by Taiho Pharma                                                                                                                             |
| 71 | Slagter et al., 2020      | 0   | Supported by Department of Health and NIH grants and charity grants                                                                                   |
| 72 | Sonpavde et al., 2011     | 2   | Aventis Pharmaceuticals                                                                                                                               |
| 73 | Stevenson et al., 2012    | 2   | Supported by Hoffmann-La Roche and sanofi-aventis                                                                                                     |
| 74 | Tahover et al., 2015      | 2   | Supported by a grant from Genentech                                                                                                                   |
| 75 | Tan et al., 2021          | 0   | No conflict of interest                                                                                                                               |
| 76 | Tryfonidis et al., 2013   | 2   | Supported in part by Aventis Pharmaceuticals                                                                                                          |
| 77 | Tunio et al., 2012        | 0   | Supported by The Zena and Michael A. Wiener Research and Therapeutic Program in Bladder Cancer and National Cancer Institute Cancer Centre Core Grant |
| 78 | Uetake et al., 2015       | N/A | Undeclared                                                                                                                                            |
| 79 | Usmani et al., 2019       | 2   | Merck Sharp & Dohme                                                                                                                                   |
| 80 | Vaishampayan et al., 2014 | 2   | Supported in part by Bristol-Myers-Squibb Inc                                                                                                         |
| 81 | Valle et al., 2021        | 2   | Grants from National Cancer Institute, and Genentech Inc and GPC Biotech                                                                              |
| 82 | Wolff et al., 2012        | 0   | Grant from National Cancer Institute                                                                                                                  |
| 83 | Yamazaki et al., 2016     | 2   | Funded by Eli Lilly and Company                                                                                                                       |
| 84 | Yardley et al., 2012      | 1   | Many honoraria, supported by West Japan Oncology Group                                                                                                |
| 85 | Zalcman et al., 2016      | 0   | No conflict of interest                                                                                                                               |
| 86 | Baggstrom et al., 2018    | 0   | Supported by National Cancer Institute                                                                                                                |
| 87 | Chavan et al., 2017       | 0   | No conflict of interest                                                                                                                               |

## Supplementary Information

### *VTE in Cancer Patients undergoing Chemotherapy*

|     |                            |     |                                                                                              |
|-----|----------------------------|-----|----------------------------------------------------------------------------------------------|
| 88  | Duivenvoorden et al., 2016 | N/A | Undeclared                                                                                   |
| 89  | Gay et al., 2010           | 0   | Supported by National Cancer Institute                                                       |
| 90  | Hong et al., 2012          | 1   | Bevacizumab provided by Roche Korea                                                          |
| 91  | Kang et al., 2012          | 0   | No conflict of interest                                                                      |
| 92  | Li et al., 2017            | N/A | Undeclared                                                                                   |
| 93  | Martella et al., 2022      | 0   | No conflict of interest                                                                      |
| 94  | Matikas et al., 2016       | 0   | Funding from Cretan Association for Biomedical Research and Hellenic Oncology Research Group |
| 95  | Monk et al., 2018          | 1   | Reception of clinical trial grants from numerous pharmaceutical companies                    |
| 96  | Slavicek et al., 2014      | 1   | Unrestricted research grants from Roche, Merck and Amgen                                     |
| 97  | Tachihara et al., 2020     | 1   | Lecture fees and grants from Eli Lilly and Company                                           |
| 98  | Tewari et al., 2018        | 2   | Grants from Genentech                                                                        |
| 99  | Yildiz et al., 2012        | 0   | No conflict of interest                                                                      |
| 100 | Lee et al., 2013           | 0   | No conflict of interest                                                                      |
| 101 | Reynes et al., 2016        | 2   | Grant from Pfizer, Merck Sharp & Dohme                                                       |
| 102 | Pinto et al., 2021         | 2   | Eli Lilly Italy                                                                              |

0 = Low potential for bias

1 = Moderate potential for bias

2 = High potential for bias

#### 4. Supplemental Figures

a. Figure S1. Forest plot showing the estimated pooled prevalence of VTE in bladder cancer patients.

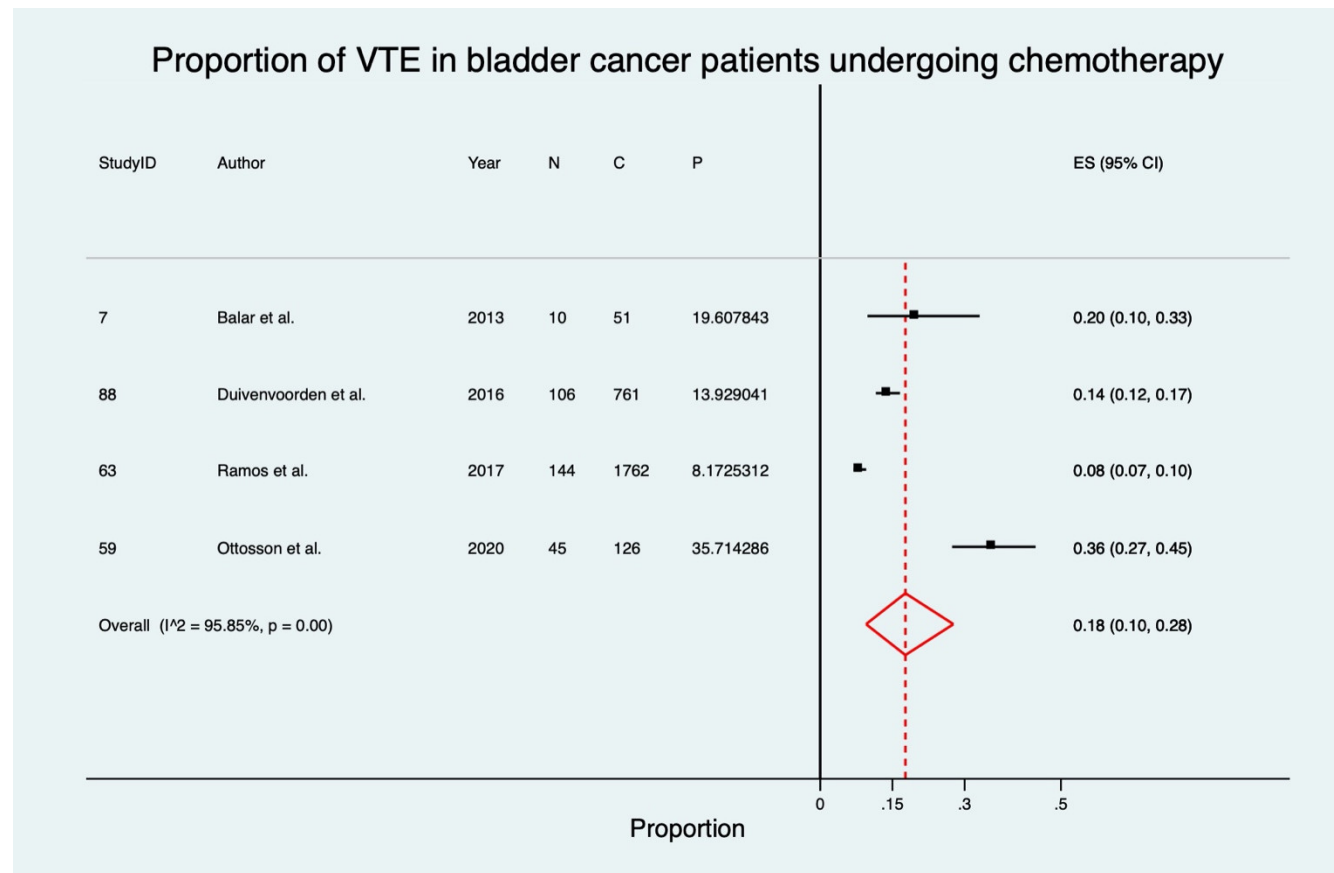

b. Figure S2. Forest plot showing the estimated pooled prevalence of VTE in brain cancer patients.

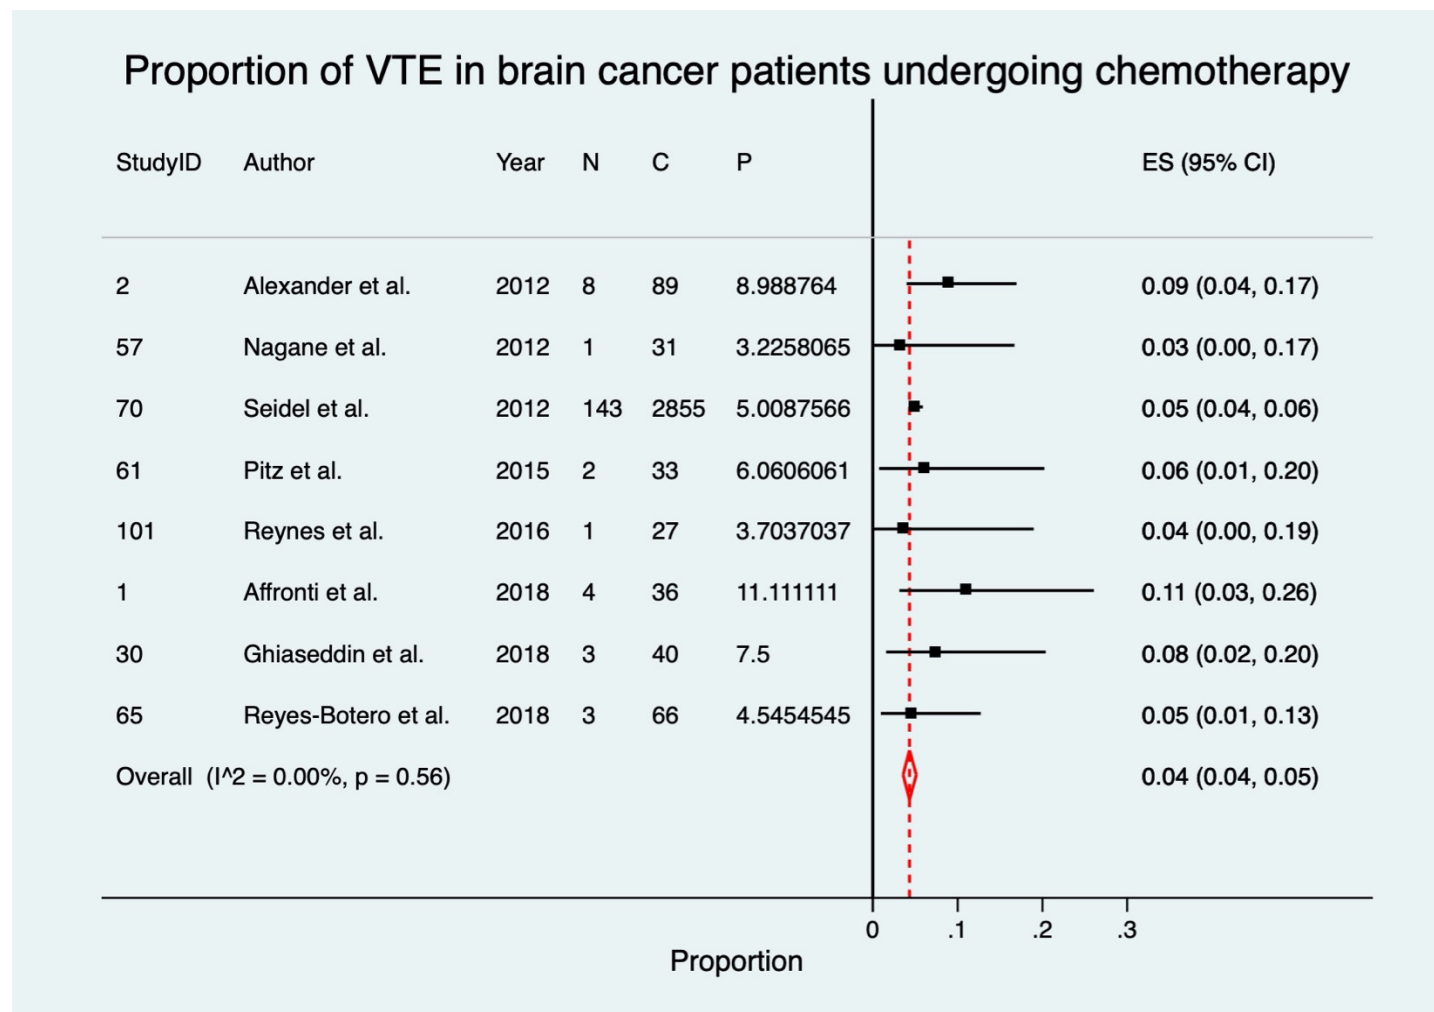

c. Figure S3. Forest plot showing the estimated pooled prevalence of VTE in breast cancer patients.

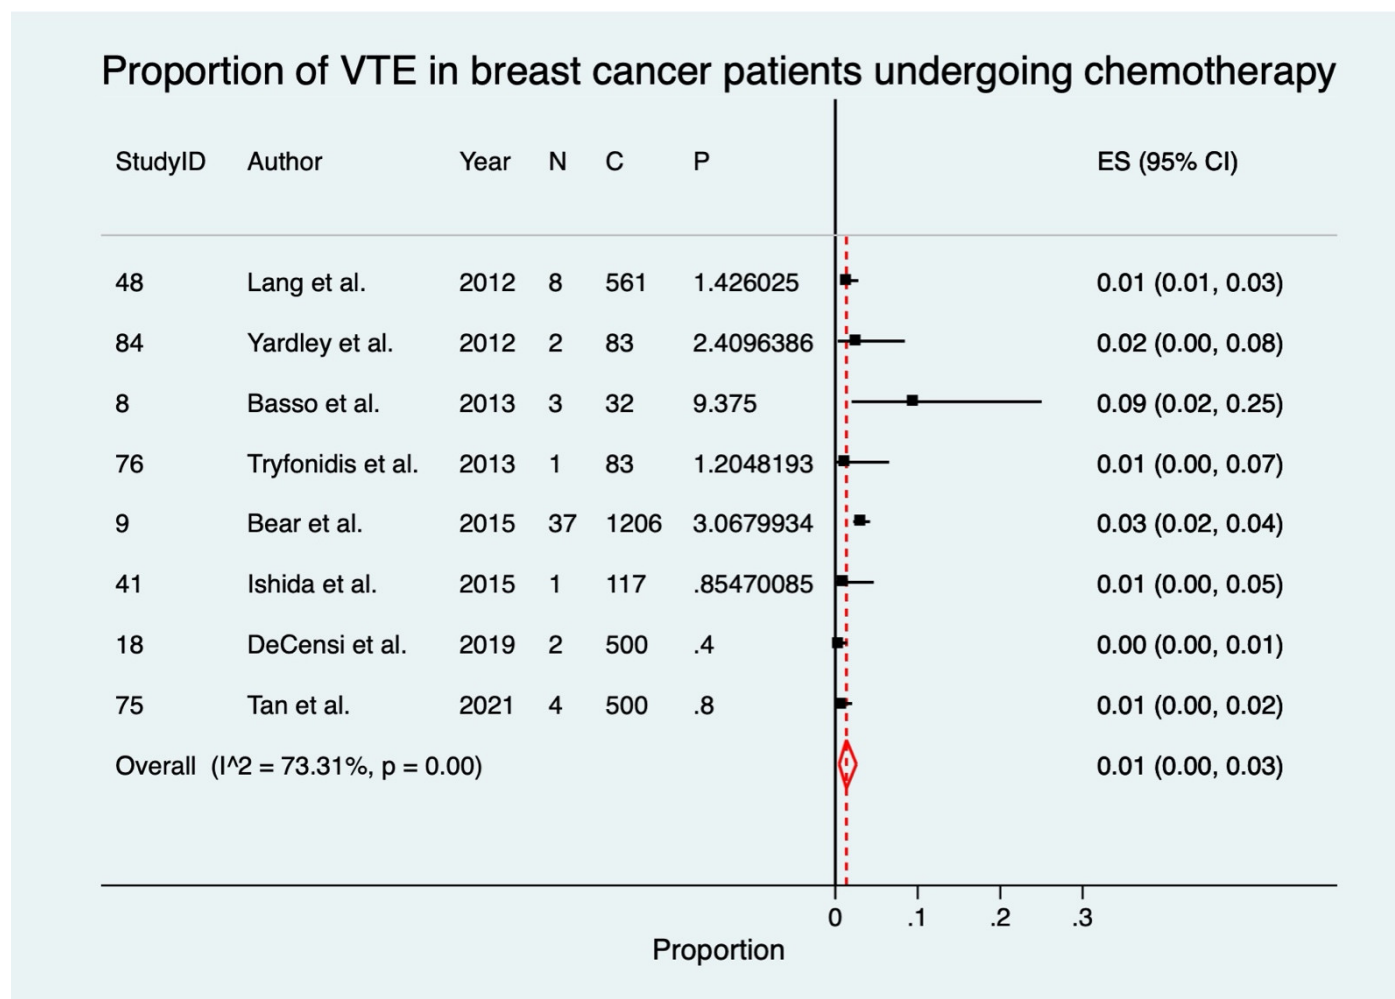

d. Figure S4. Forest plot showing the estimated pooled prevalence of VTE in colorectal cancer patients.

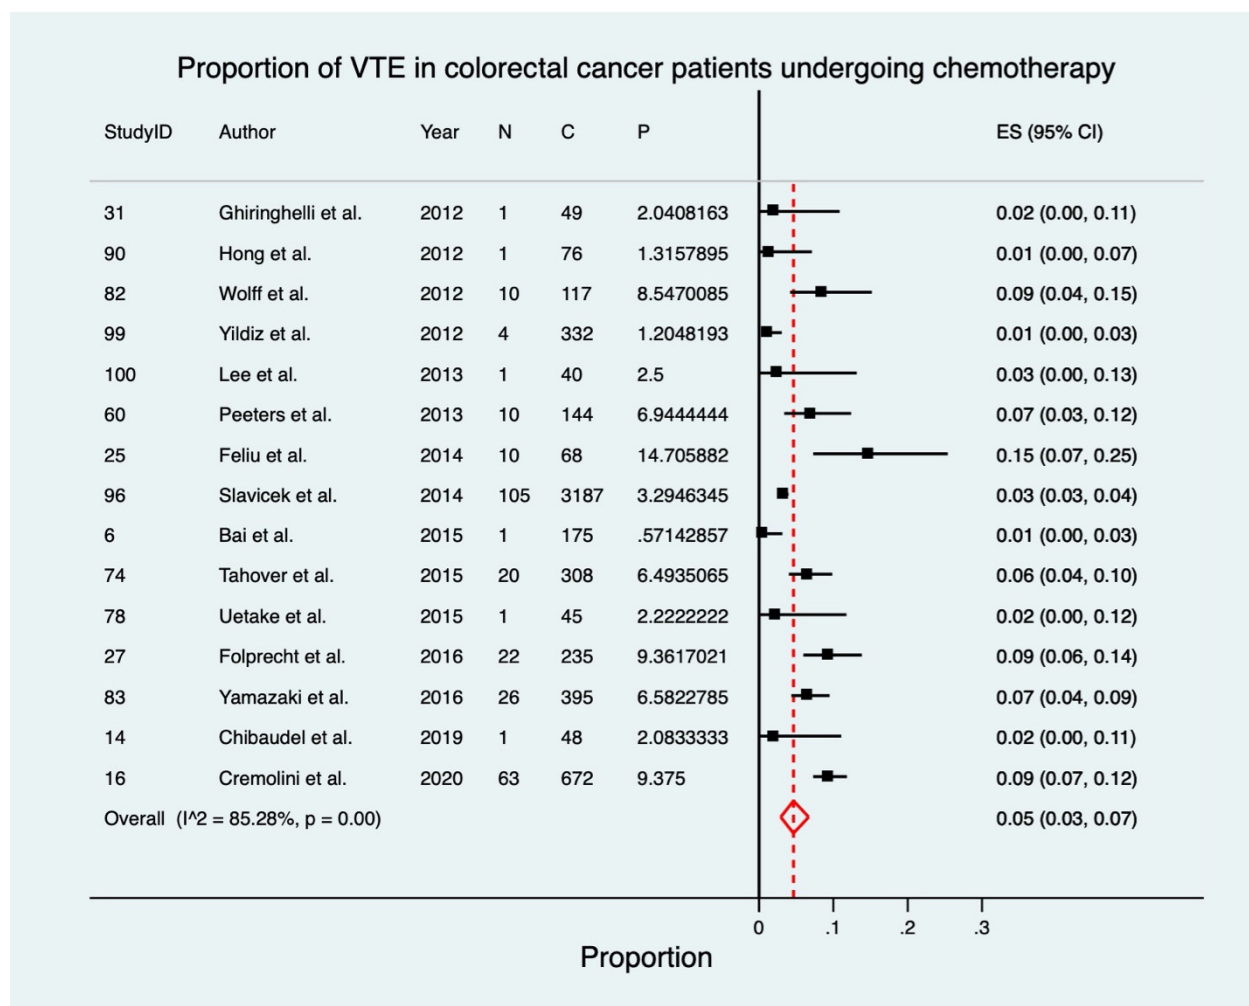

e. Figure S5. Forest plot showing the estimated pooled prevalence of VTE in gastric cancer patients.

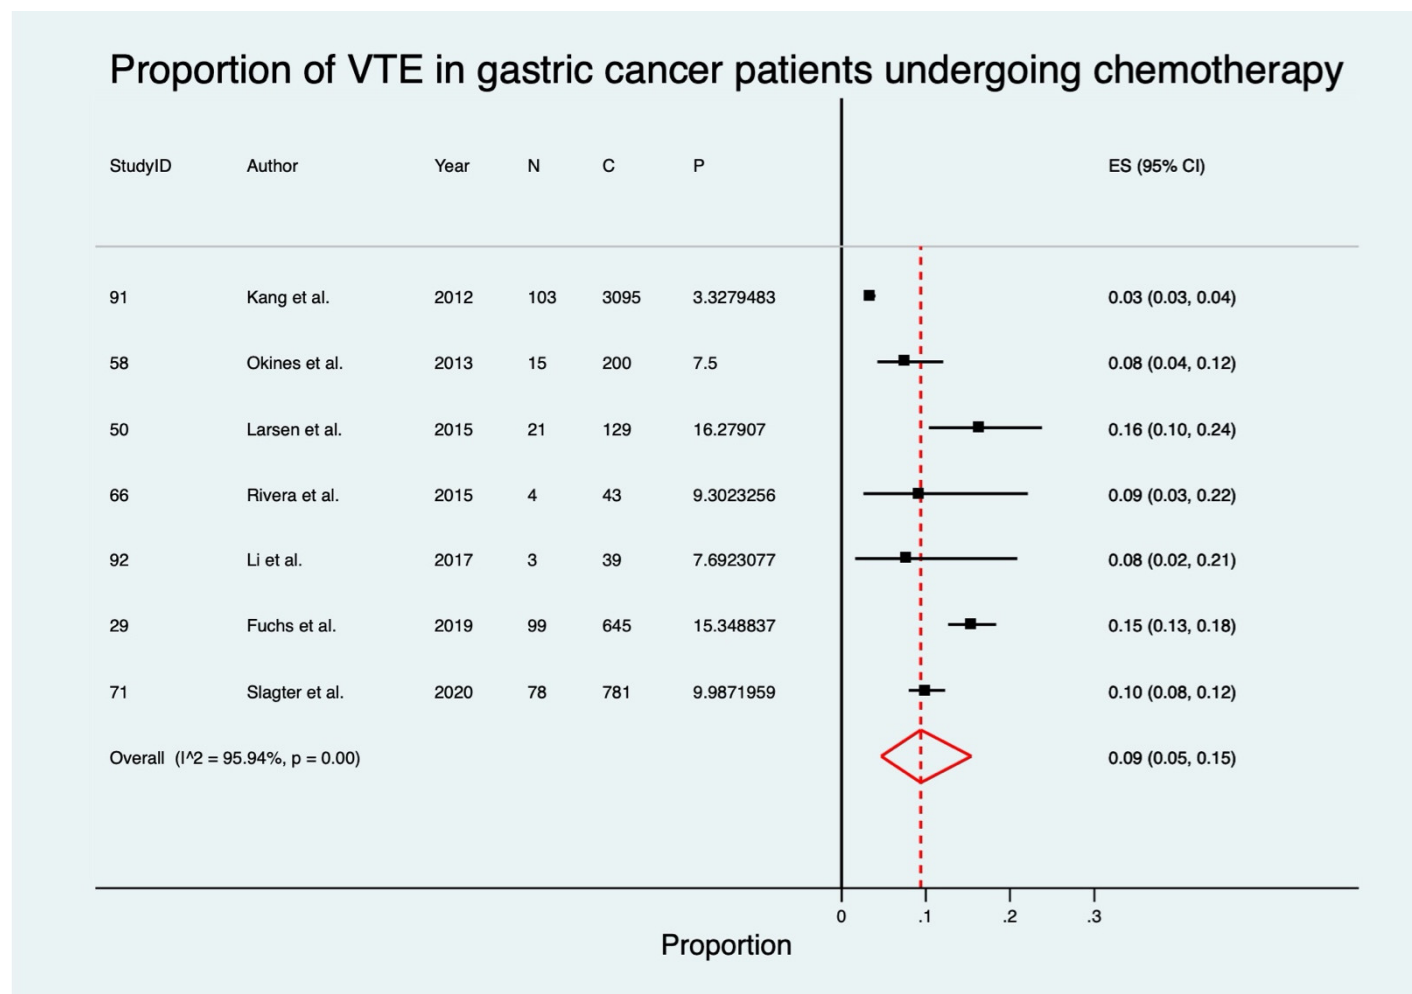

f. Figure S6. Forest plot showing the estimated pooled prevalence of VTE in lung cancer patients.

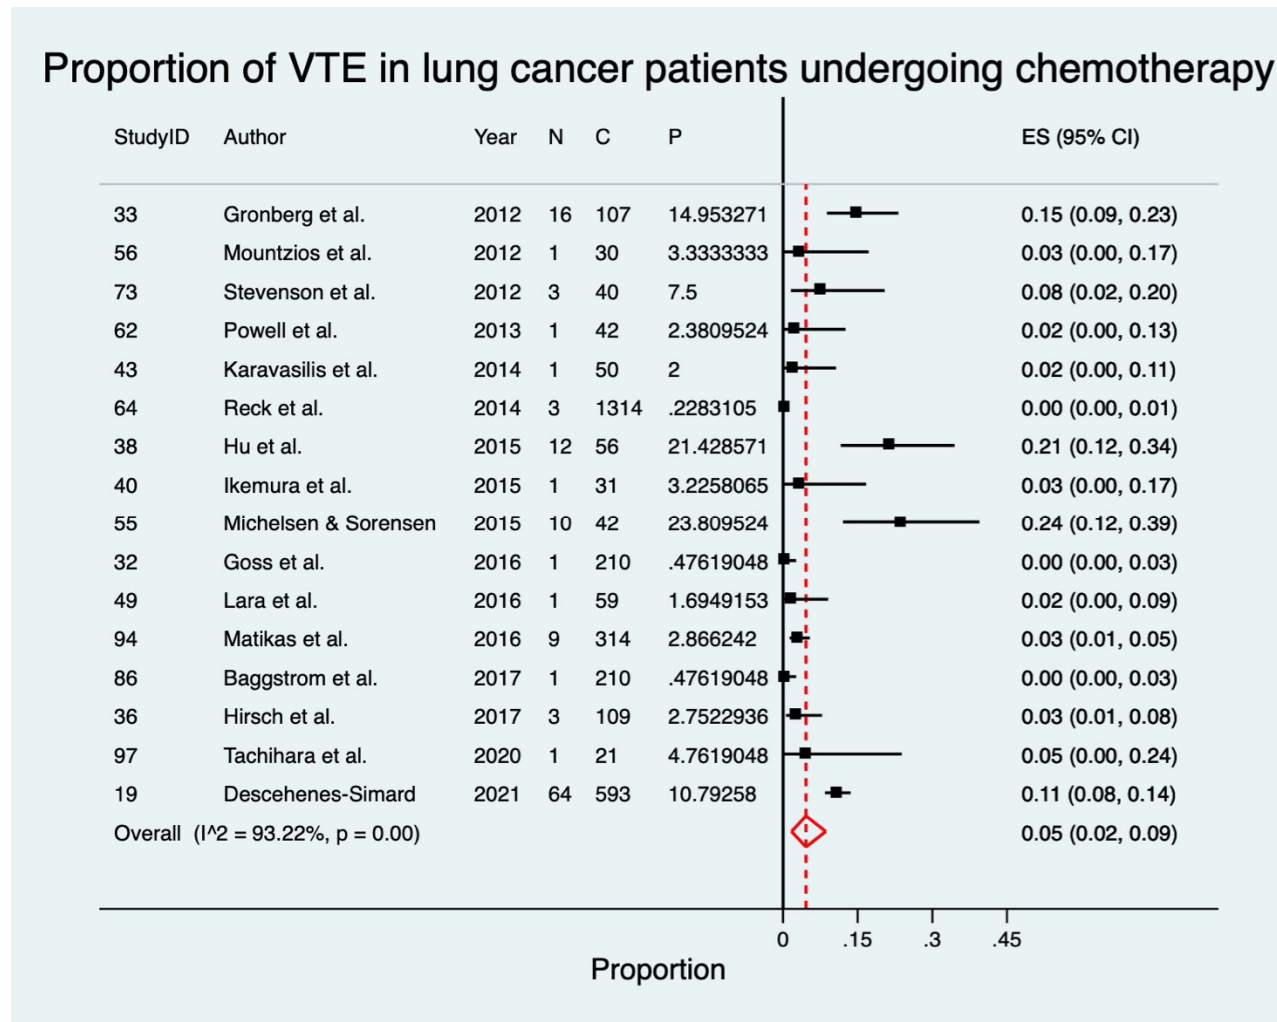

g. Figure S7.

Forest plot showing the estimated pooled prevalence of VTE in lymph cancer patients.

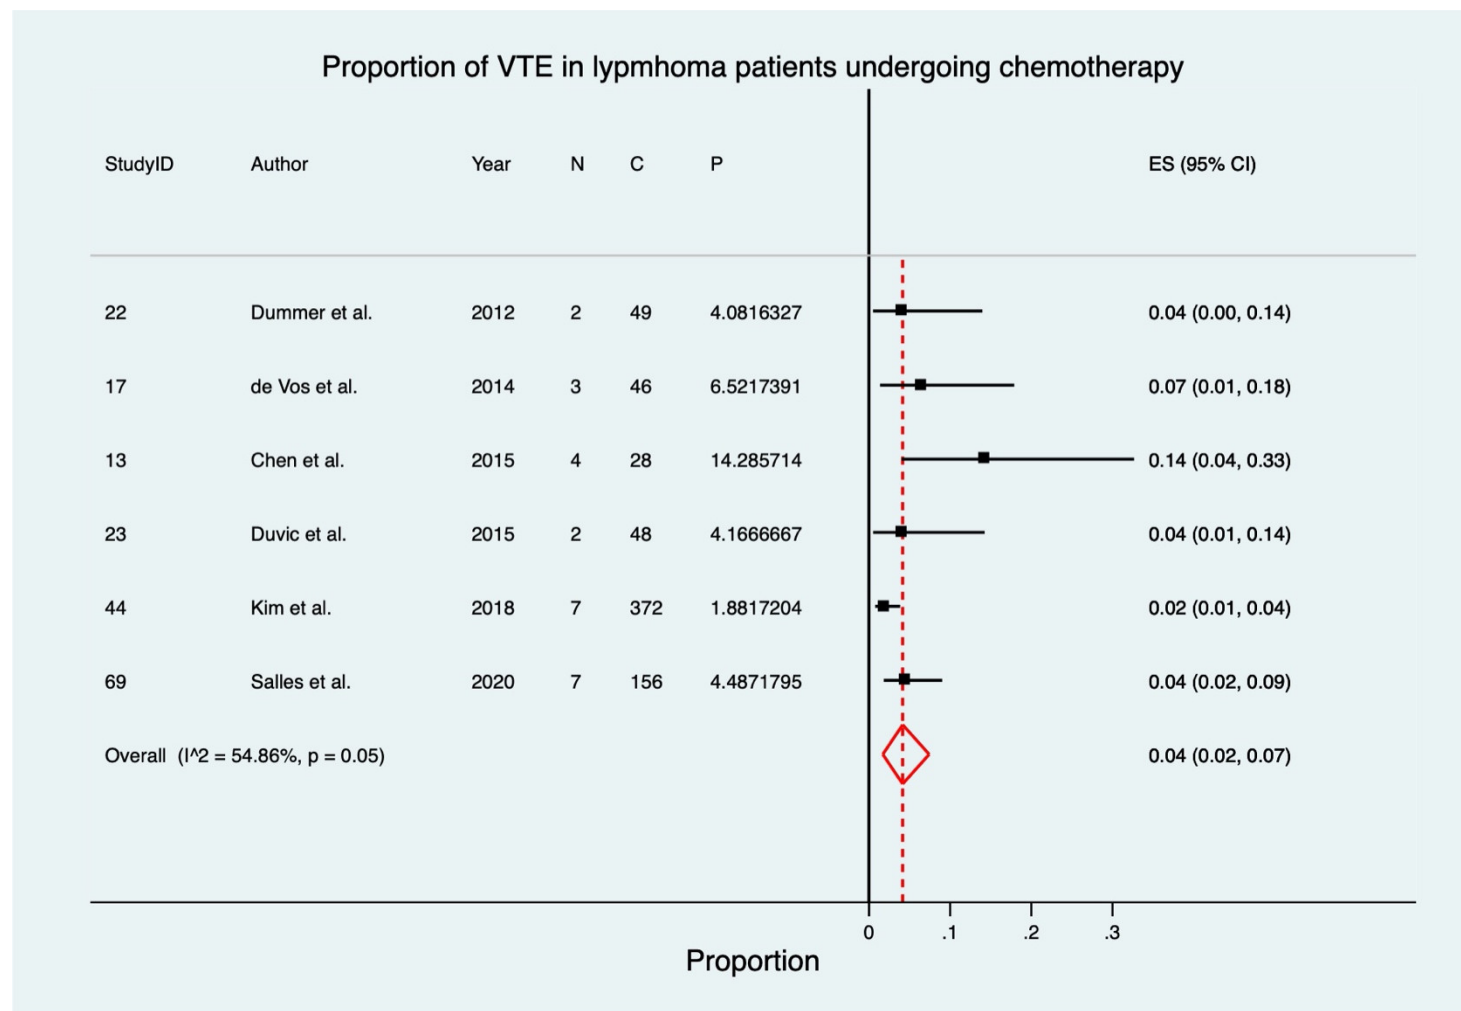

**h. Figure S8. Forest plot showing the estimated pooled prevalence of VTE in mesothelial cancer patients.**

### Proportion of VTE in mesothelial cancer patients undergoing chemotherapy

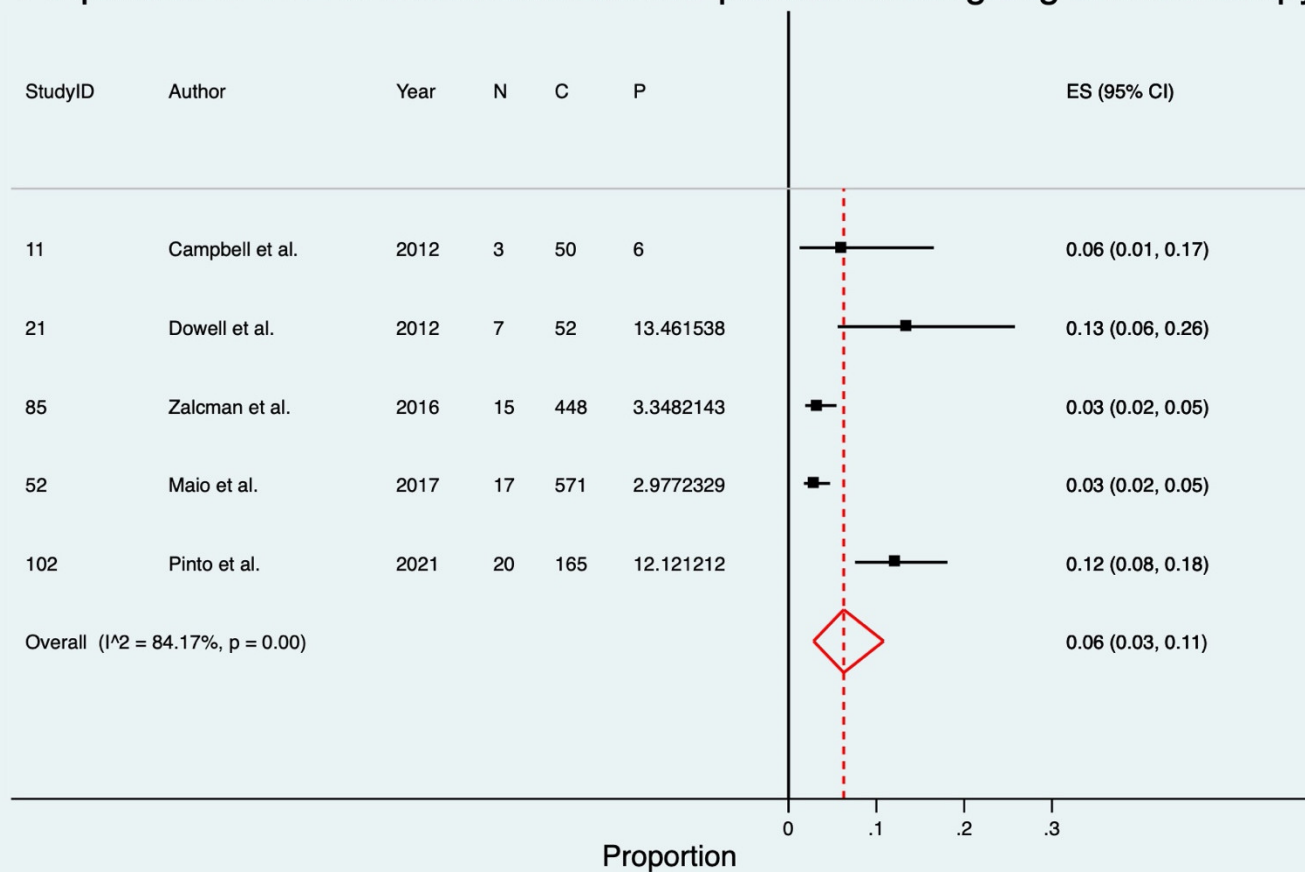

### i. Figure S9. Forest plot showing the estimated pooled prevalence of VTE in ovarian cancer patients.

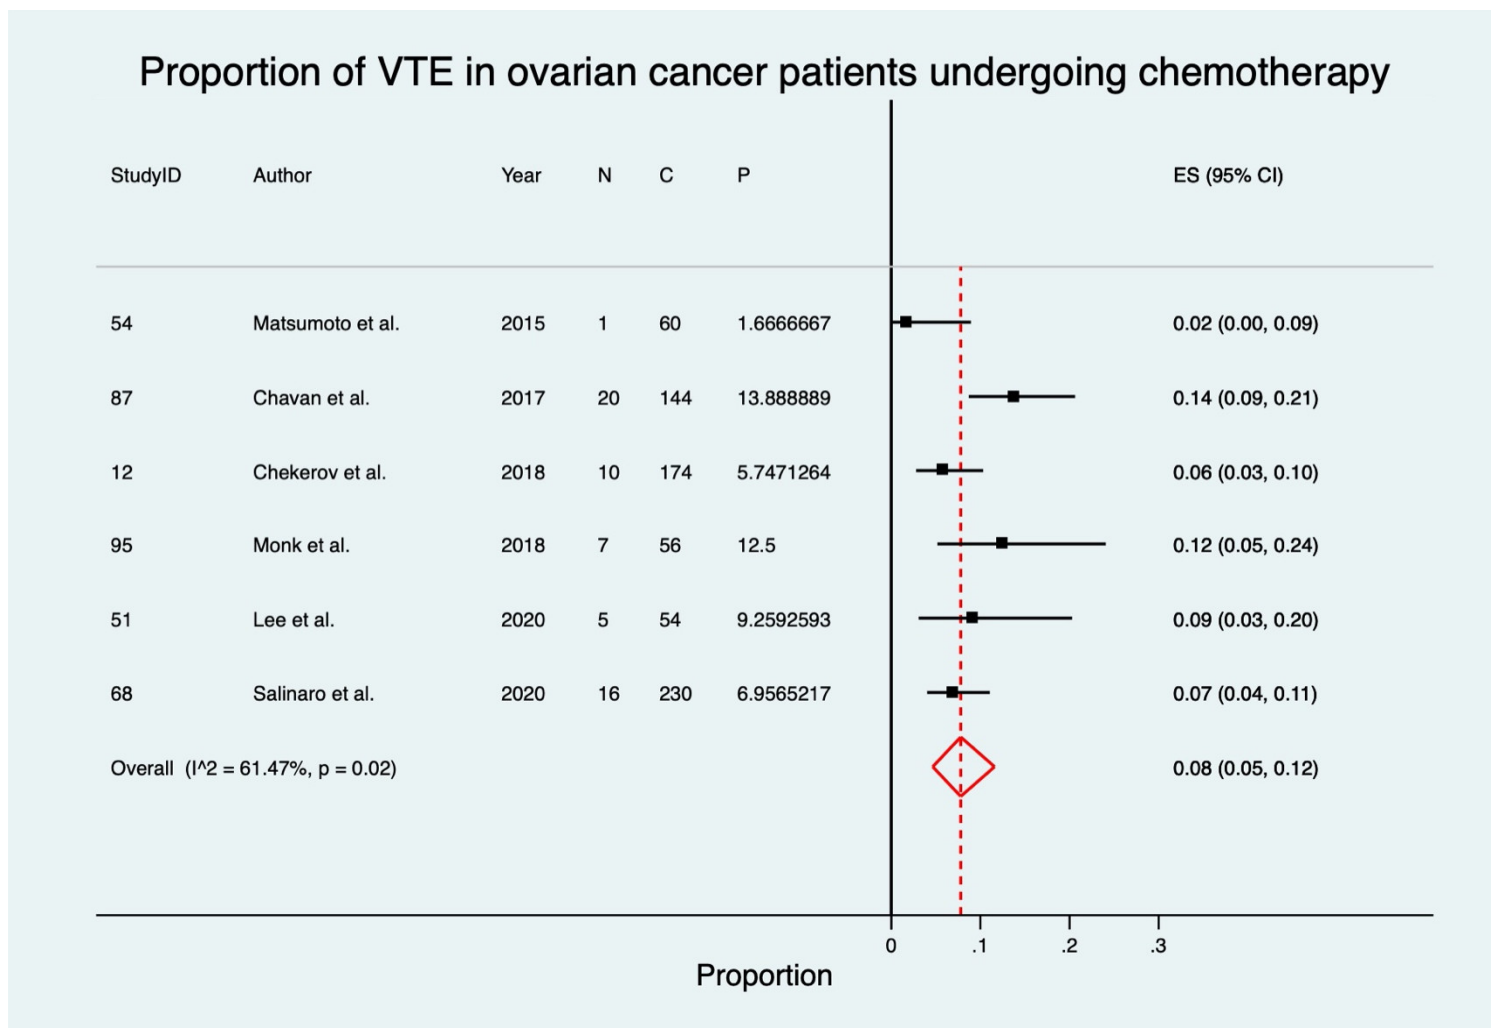

Supplement: Supplementary file 1 [file diagnostics-12-02954-s001.zip › diagnostics-1960491-supplementary (1).pdf]
